# Supplementary material for: Single-Cell Atlas of the <em>Drosophila</em> Leg Disc Identifies a Long Non-Coding RNA Associated with Distal Leg Development
Source: Preprints.org preprint supplement (doi:10.20944/preprints202205.0378.v1), 2022-05-27
Supplement: Supplementary file 2 [file supplementary]

|                                                          | T1                  | T2                  | T3                  |
|----------------------------------------------------------|---------------------|---------------------|---------------------|
| Total number of reads                                    | 136,708,491         | 105,793,081         | 117,487,726         |
| Number of mapped reads (%)                               | 131,732,137 (96.4%) | 102,923,413 (97.3%) | 113,716,848 (96.8%) |
| Number of unmapped reads (%)                             | 4,976,354 (3.6%)    | 2,869,668 (2.7%)    | 3,770,878 (3.2%)    |
| Number of reads aligned to genes                         | 120,438,184         | 92,190,389          | 102,157,323         |
| Percentage of mapped reads aligned to genes              | 91.4%               | 89.6%               | 89.8%               |
| Number of genes with >= 20 total UMI counts across cells | 8,223               | 7,905               | 7,651               |
| Number of cells                                          | 3,623               | 3,365               | 3,704               |
| Mean reads per cell                                      | 37,734              | 26,921              | 31,719              |
