# Supplementary material for: Single-Cell Atlas of the <em>Drosophila</em> Leg Disc Identifies a Long Non-Coding RNA Associated with Distal Leg Development
Source: Preprints.org preprint supplement (doi:10.20944/preprints202205.0378.v1), 2022-05-27
Supplement: Supplementary file 6 [file supplementary]

| Primer Name     | Primer sequence(5'to3')   |
|-----------------|---------------------------|
| bnl-For         | TACGGCTCGAAAGACTTCACC     |
| bnl-Rev         | CCATTCAGGGCCAGGTAGAAGA    |
| boi-For         | TCCGATAAGAACAACCTCTGGACTG |
| boi-Rev         | CTGCTGGTGGTAGTCCAGTC      |
| CG30371-For     | CGTAGGAACGAGCACACCATTC    |
| CG30371-Rev     | GTCCTGGTTGGTGACCACATT     |
| CG32333-For     | CCATCTGCTAGTTGACAGTCGTC   |
| CG32333-Rev     | CATTGCCGTTCAAGGCTGCT      |
| CG43444-Tet-For | TGGACAAATTTCCCTGCGAGGTA   |
| CG43444-Tet-Rev | GCTGCTCTGGCTATTGGCATC     |
| CG6841-For      | ATTGATGATGCTGAATTCTGCGCAA |
| CG6841-Rev      | GGTTCTTTTCAAAGTAGGCGGCT   |
| CG9129-For      | AGAACGGAAGCTGTGTCAACC     |
| CG9129-Rev      | CTCTCCGTGCGCTTCTTGTAAG    |
| chinmo-For      | ACAGTCCAGTCGCTACGAGAAC    |
| chinmo-Rev      | CGGTCGTCGTCATTAGCCTCA     |
| Cka-For         | ATTGCAGGCTCGCATTGCTA      |
| Cka-Rev         | GGATCGGTGCCGTATTTTAAACG   |
| CSN1b-For       | CACCACTCATGCAGAACGC       |
| CSN1b-Rev       | CGATCCCGGCATATTGGTTG      |
| disco-r-For     | GATACTGGAGGTTGGCATCCACA   |
| disco-r-Rev     | GTCCAGCGGCATGCTATCAAT     |
| eIF6-For        | CAACACCTGCGTAACAGCCT      |
| eIF6-Rev        | ATCTCCTCGGTCTCCTTGTTCA    |
| mys-For         | TATCGCAAATCTCCTCTTCGGT    |
| mys-Rev         | TCAGATTGTGCGCACTTAGAGGTCT |
| PI31-For        | CGTGGCGGATCCTTCATTCC      |
| PI31-Rev        | CCATATTTGGGCGTGATGGAAAG   |
| Piezo-For       | TGTTCTGACAACCGGACTGC      |
| Piezo-Rev       | CATGTAGATGATGTAGGTGCGCAA  |
| sick-For        | CAATGTTGACCACAAGTCCTCGA   |
| sick-Rev        | CGTGGTGCAGGTTGTCCAAA      |
| Dll-For         | TCCACCGAAGGATGACTTCTCC    |
| Dll-Rev         | CAGTTGCAGCGAGCTGTAGA      |
| dac-For         | GATGACGAAGATTTGAGTGACACG  |
| dac-Rev         | ACACCCAGATGGGACAGACC      |
| hth-For         | AAGGATGCGATTTATGAACATCCG  |
| hth-Rev         | CGATTCCGACGAACAGACATC     |
| Hh-For          | GCTCCGTCAAGTCAGATTCGTC    |
| Hh-Rev          | GTCATGCTCAAAACACGATCTCC   |
| wg-For          | GTCAGGGACGCAAGCATAATAGATA |
| wg-Rev          | CTCGGCGAAGGCTCCAGATA      |
| dpp-For         | CACACAAAGATAGTAAAATCGACGA |
| dpp-Rev         | ACCTGTTGACTGAGTGCGT       |
