# Supplementary material for: Single-Cell Atlas of the <em>Drosophila</em> Leg Disc Identifies a Long Non-Coding RNA Associated with Distal Leg Development
Source: Preprints.org preprint supplement (doi:10.20944/preprints202205.0378.v1), 2022-05-27
Supplement: Supplementary file 7 [file supplementary]

Archive with 7 entries (7 files):
- Figure S1.pdf
- Figure S2.pdf
- Figure S3.pdf
- Figure S4.pdf
- Supplementary_legends_Drosophila_singlecell_w1118.docx
- Table S1.pdf
- Table S2.pdf
