# Supplementary figures and images for: Single-Cell Atlas of the <em>Drosophila</em> Leg Disc Identifies a Long Non-Coding RNA Associated with Distal Leg Development
Source: Preprints.org preprint supplement (doi:10.20944/preprints202205.0378.v1), 2022-05-27

Early Muscle Cells

Late Muscle Cells

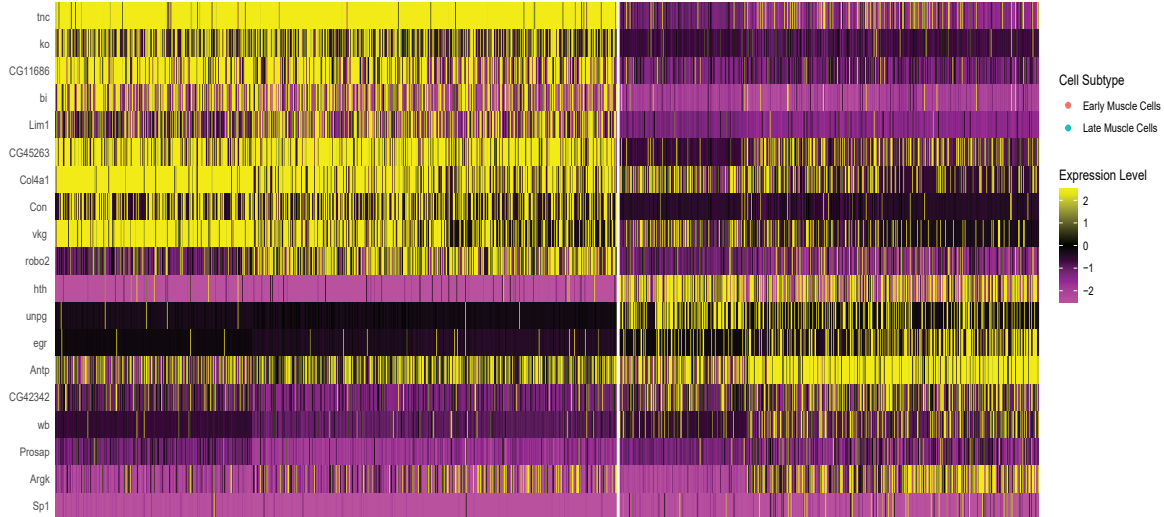

Supplement: Supplementary file 1 [file supplementary]

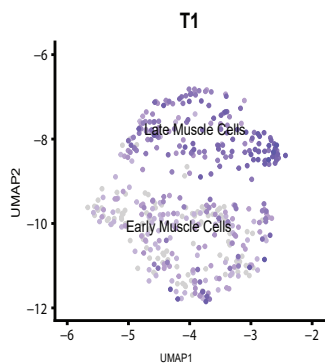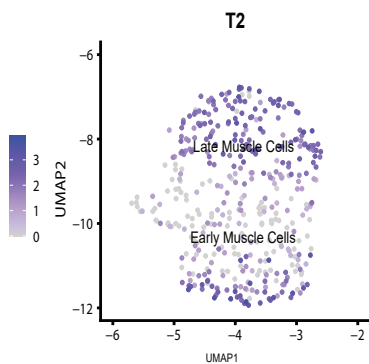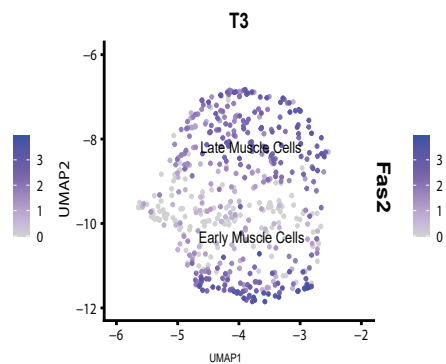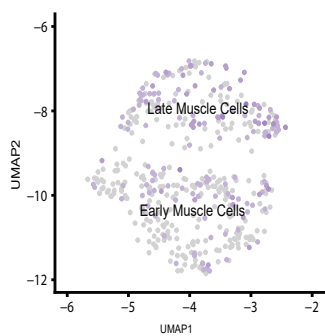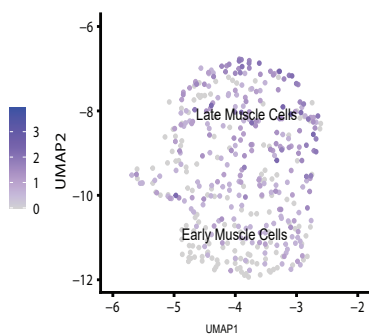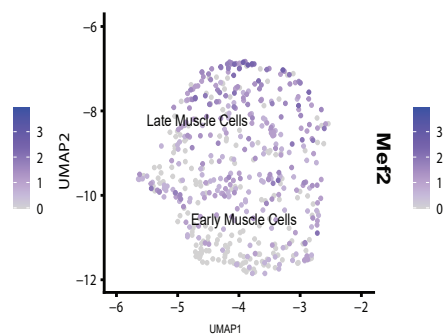

Supplement: Supplementary file 3 [file supplementary]

Early Neuronal Cells

Late Neuronal Cells

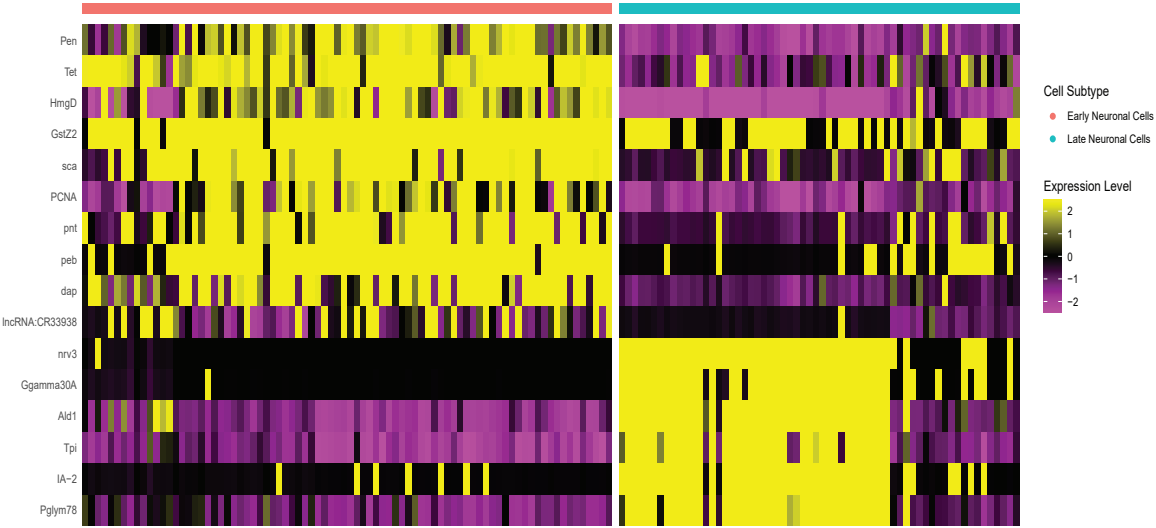

Supplement: Supplementary file 4 [file supplementary]

Hemocytes + Plasmatocytes

Glia

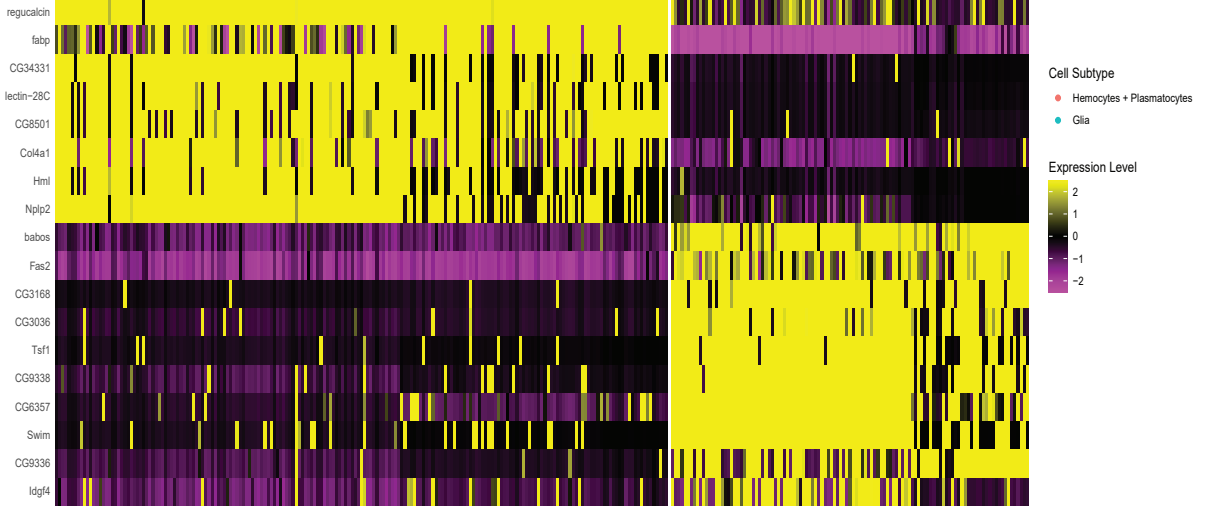

Supplement: Supplementary file 5 [file supplementary]
